# Supplementary material for: Label-free, automated classification of microsatellite status in colorectal cancer by infrared imaging
Source: PubMed Central journal article supplement (PMC7311536; doi:10.1038/s41598-020-67052-z), 2020-06-23
Supplement: 41598_2020_67052_MOESM1_ESM.pdf [file 41598_2020_67052_MOESM1_ESM.pdf]

# Supplementary material

## Label-free, automated classification of microsatellite status in colorectal cancer by infrared imaging

**Authors:** Angela Kallenbach-Thieltges<sup>1,2†</sup>, Frederik Großerueschkamp<sup>1,2†</sup>, Hendrik Jütte<sup>3†</sup>, Claus Kuepper<sup>1,2</sup>, Anke Reinacher-Schick<sup>4</sup>, Andrea Tannapfel<sup>3</sup>, Klaus Gerwert<sup>1,2\*</sup>

---

### Affiliations:

<sup>1</sup> Ruhr University Bochum, Center for Protein Diagnostics (ProDi), Biospectroscopy, Germany.

<sup>2</sup> Ruhr University Bochum, Faculty of Biology and Biotechnology, Department of Biophysics, Germany.

<sup>3</sup> Institute of Pathology, Ruhr University Bochum, Germany.

<sup>4</sup> Department of Hematology, Oncology and Palliative Care, St. Josef Hospital, Ruhr University Bochum, Germany.

\* To whom correspondence should be addressed: [gerwert@bph.rub.de](mailto:gerwert@bph.rub.de)

† These authors contributed equally.

- Supplementary Figure 01:** H&E stained tissue thin section of a high grade MSI-H CRC sample in comparison to the corresponding diagnostic IR image.
- Supplementary Figure 02:** Mean spectra of the training data for selected classes with standard deviation.
- Supplementary Figure 03:** Mean spectra of the training data for MSI-H and MSS tumor cells.
- Supplementary Table 01:** IHC, PCR and IR imaging results for the 40 training/testing patients
- Supplementary Table 02:** Available metadata for all tumor patients
- Supplementary Table 03:** Breakdown of patient samples according to their use in the presented feasibility study.

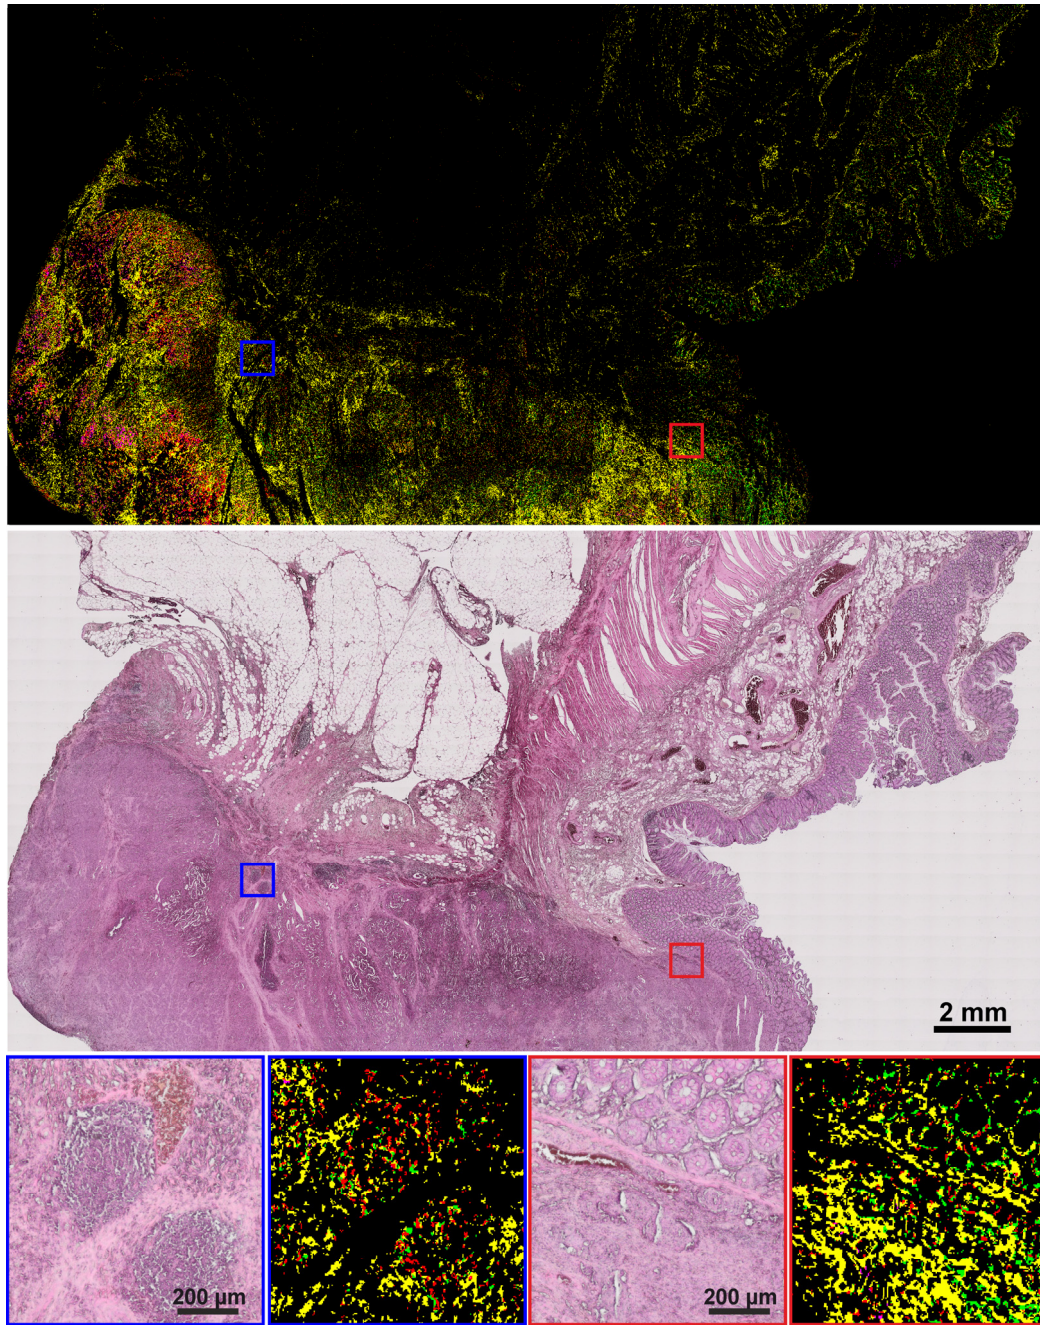

**Supplementary Figure 01: H&E stained tissue thin section of a high grade MSI-H CRC sample in comparison to the corresponding diagnostic IR image.** The IR image resulting of the second RF shows inflammatory infiltrates in yellow and tumor regions in red. Necrosis is marked in magenta. It is visible in the magnification cut outs that the tumor (blue rectangle) and its microenvironment (red rectangle) are massively infiltrated by immune cells.

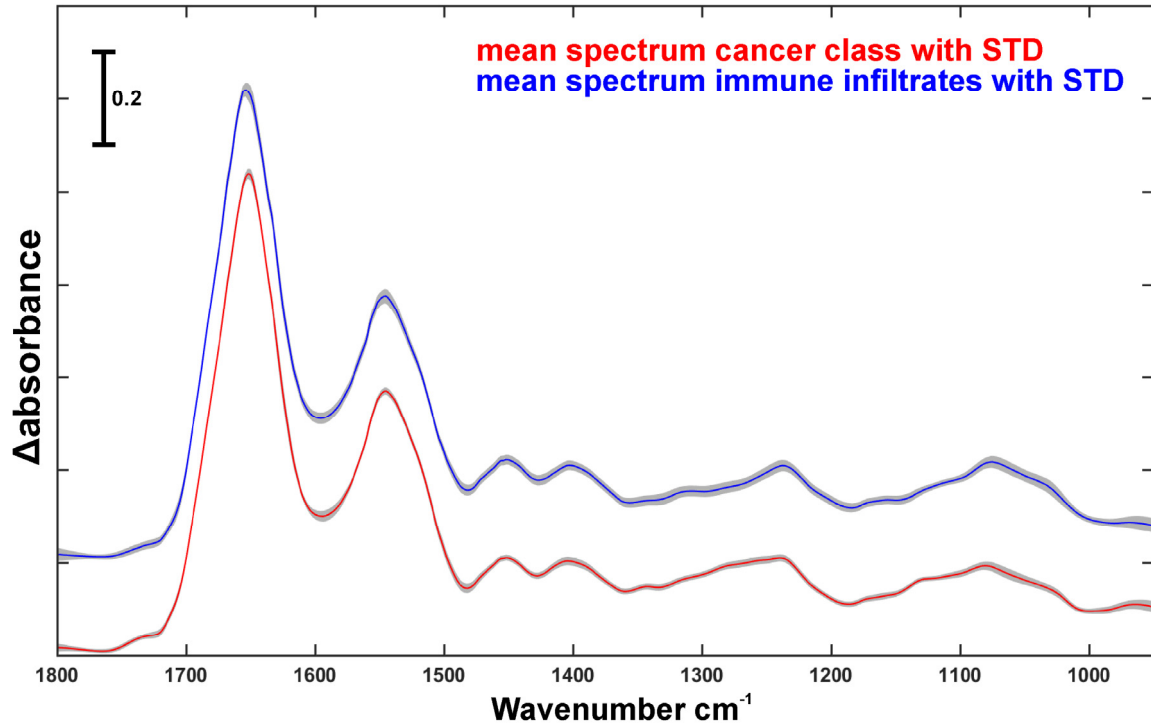

**Supplementary Figure 02: Mean spectra of the training data for selected classes with standard deviation.** Red spectrum, the mean of the cancer class from the second RF. Blue spectrum, the mean of immune infiltrates training spectra. The grey area marks the standard deviation over the training data. It can be seen that spectral differences between cancer and peritumorous immune infiltrates are quite small. Well defined classes with thousands of spectra are needed to represent these subtle differences.<sup>30</sup>

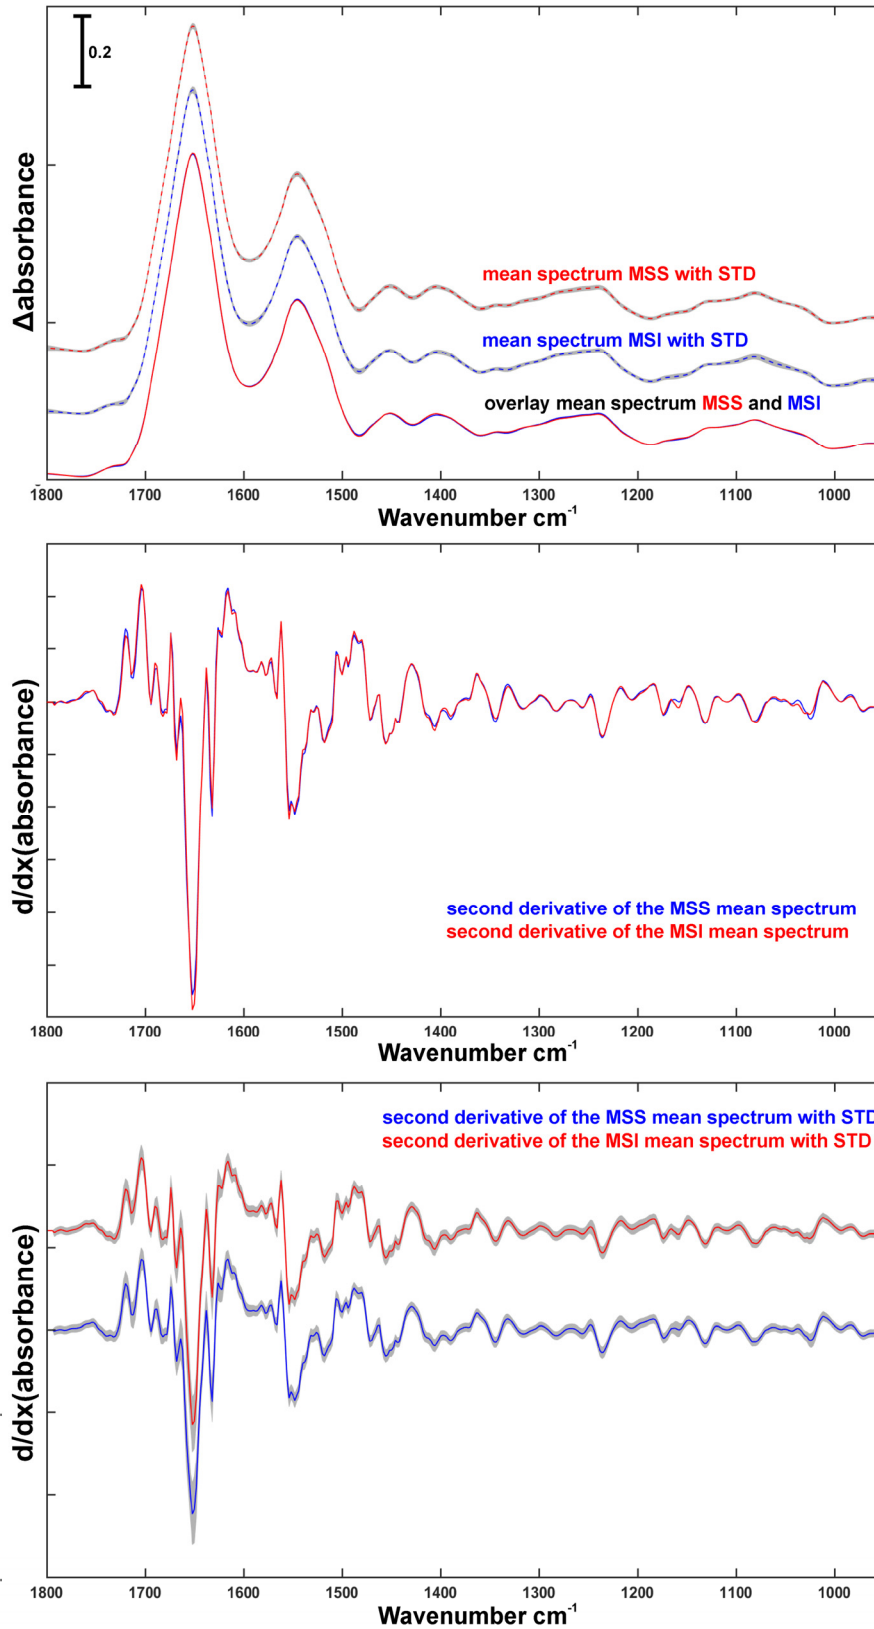

**Supplementary Figure 03: Mean spectra of the training data for MSI-H and MSS tumor cells.** In all panel MSI-H in blue and MSS in red. The dashed and solid lines are representing

the same. The grey area marks the standard deviation over the training data. For better visualization, the spectra and their second derivatives are shown as overlay without STD and shifted with STD. There are only very small differences between the spectral classes. Therefore, the training and preparation of training data for the third RF classifier is much more complicated than for other spectral class.

**Supplementary Table 01:** The table shows the IHC, PCR and IR imaging results for the 40 training/testing patients. Two of the 21 MSS patients were misclassified. (Abbreviations: FLA – fragment length analysis, IHC+ - no missing MMR proteins, is – instable, s – stable, NA – DNA quality insufficient, ND – not done following Bethesda guidelines, when BAT25+BAT26 instable). Patients in training/testing Tr01 – Tr33 and for testing only Te01 – Te07.

| Patient | MLH1 % | MSH2 % | MSH6 % | PMS2 % | MSI-FLA | BAT25 | BAT26 | D17S250 | D2S123 | D5S346 | IR imaging | IR MSI-H positive % |
|---------|--------|--------|--------|--------|---------|-------|-------|---------|--------|--------|------------|---------------------|
| Tr01    | 2      | 95     | 70     | 2      | MSI-H   | is    | is    | is      | is     | is     | MSI-H      | 64,28               |
| Tr02    | 5      | 95     | 60     | 2      | MSI-H   | is    | is    | is      | is     | s      | MSI-H      | 79,45               |
| Tr03    | 1      | 90     | 60     | 1      | MSI-H   | is    | is    | is      | is     | is     | MSI-H      | 73,92               |
| Tr04    | <1     | 75     | 75     | <1     | MSI-H   | is    | is    | is      | is     | is     | MSI-H      | 65,72               |
| Tr05    | 0      | 95     | 80     | 0      | MSI-H   | is    | is    | s       | is     | is     | MSI-H      | 65,50               |
| Tr06    | 0      | 80     | 20     | 1      | MSI-H   | is    | is    | is      | is     | is     | MSI-H      | 71,03               |
| Tr07    | 0      | 80     | 70     | 1      | MSI-H   | is    | is    | is      | is     | s      | MSI-H      | 63,28               |
| Tr08    | 0      | 90     | 90     | 0      | MSI-H   | is    | is    | is      | is     | is     | MSI-H      | 80,80               |
| Tr09    | N.A.   | 30     | 10     | 0      | MSI-H   | is    | is    | is      | is     | is     | MSI-H      | 70,63               |
| Tr10    | 0      | 80     | 70     | 0      | MSI-H   | is    | is    | is      | is     | is     | MSI-H      | 73,52               |
| Tr11    | 1      | 85     | 65     | 1      | MSI-H   | is    | is    | s       | s      | s      | MSI-H      | 63,02               |
| Tr12    | 0      | 85     | 80     | 0      | MSI-H   | is    | is    | s       | s      | s      | MSI-H      | 72,30               |
| Tr13    | 1      | 90     | 30     | 1      | MSI-H   | is    | is    | is      | is     | is     | MSI-H      | 70,27               |
| Tr14    | 0      | 85     | 70     | 0      | MSI-H   | is    | is    | is      | is     | is     | MSI-H      | 84,74               |
| Tr15    | 80     | 5      | <10    | 70     | MSI-H   | is    | is    | s       | is     | is     | MSI-H      | 73,28               |
| Tr16    | <1     | 80     | 30     | <1     | MSI-H   | is    | is    | is      | is     | is     | MSI-H      | 68,70               |
| Tr17    | 80     | 5      | <10    | 70     | MSI-H   | is    | is    | is      | is     | is     | MSI-H      | 91,22               |
| Tr18    | 60     | 80     | 80     | 45     | IHC+    |       |       |         |        |        | MSS        | 36,59               |
| Tr19    | 90     | 95     | 80     | 75     | IHC+    |       |       |         |        |        | MSS        | 47,95               |
| Tr20    | 80     | 70     | 60     | 65     | IHC+    |       |       |         |        |        | MSS        | 43,89               |
| Tr21    | 90     | 95     | 85     | 85     | IHC+    |       |       |         |        |        | MSS        | 40,10               |
| Tr22    | 45     | 75     | 70     | 40     | IHC+    |       |       |         |        |        | MSS        | 41,19               |
| Tr23    | 90     | 95     | 70     | 85     | IHC+    |       |       |         |        |        | MSS        | 51,89               |
| Tr24    | 80     | 90     | 75     | 70     | IHC+    |       |       |         |        |        | MSS        | 53,37               |
| Tr25    | 85     | 80     | 70     | 75     | IHC+    |       |       |         |        |        | MSS        | 40,37               |
| Tr26    | 80     | 90     | 75     | 75     | IHC+    |       |       |         |        |        | MSS        | 43,13               |
| Tr27    | 70     | 80     | 65     | 75     | IHC+    |       |       |         |        |        | MSS        | 47,06               |

| Patient | MLH1 % | MSH2 % | MSH6 % | PMS2 % | MSI-FLA | BAT25 | BAT26 | D17S250 | D2S123 | D5S346 | IR imaging | IR MSI-H positive % |
|---------|--------|--------|--------|--------|---------|-------|-------|---------|--------|--------|------------|---------------------|
| Tr29    | 85     | 90     | 75     | 90     | IHC+    |       |       |         |        |        | MSS        | 59,95               |
| Tr30    | 85     | 95     | 80     | 80     | IHC+    |       |       |         |        |        | MSS        | 50,97               |
| Tr31    | 98     | 95     | 95     | 80     | IHC+    |       |       |         |        |        | MSS        | 58,70               |
| Tr32    | 100    | 95     | 95     | 90     | IHC+    |       |       |         |        |        | MSS        | 55,23               |
| Tr33    | 80     | 85     | 40     | 70     | IHC+    |       |       |         |        |        | MSS        | 49,02               |
| Te01    | 1      | 90     | 25     | <1     | MSI-H   | is    | is    | is      | is     | is     | MSI-H      | 84,76               |
| Te02    | 1      | 90     | 75     | 0      | MSI-H   | is    | is    | s       | is     | is     | MSI-H      | 63,17               |
| Te03    | 80     | 60     | 25     | 75     | IHC+    |       |       |         |        |        | MSS        | 63,32               |
| Te04    | 85     | 25     | 70     | 60     | IHC+    |       |       |         |        |        | MSS        | 47,94               |
| Te05    | 75     | 90     | 90     | 50     | IHC+    |       |       |         |        |        | MSS        | 35,94               |
| Te06    | 60     | 65     | 75     | 45     | IHC+    |       |       |         |        |        | MSS        | 48,09               |
| Te07    | 65     | 75     | 90     | 70     | IHC+    |       |       |         |        |        | MSS        | 74,95               |

**Supplementary Table 02:** Available metadata for all patients. Shown are all tumor samples for the independent verification cohort (V01 – V60) and the training/testing cohort (Tr01 – Tr33 and Te01 – Te07).

| Patient | UICC | T category | N category | M category | Gender | AGE |
|---------|------|------------|------------|------------|--------|-----|
| V01     | 2    | T3b        | N0         | M0         | f      | 84  |
| V02     | 3    | T3c        | N0         | M0         | f      | 81  |
| V03     | 2    | T3         | N0         | M0         | m      | 84  |
| V04     | 2    | T3b        | N0         | M0         | m      | 81  |
| V05     | 3    | T3b        | N1a        | M0         | m      | 87  |
| V06     | 2    | T3c        | N0         | M0         | f      | 74  |
| V07     | 2    | T3b        | N0         | M0         | f      | 68  |
| V08     | 3    | T3a        | N1a        | M0         | m      | 70  |
| V09     | 2    | T4b        | N0         | M0         | f      | 74  |
| V10     | 2    | T3c        | N0         | M0         | f      | 88  |
| V11     | 2    | T3a        | N0         | M0         | f      | 69  |
| V12     | 3    | T3b        | N2a        | M0         | f      | 41  |
| V13     | 2    | T3b        | N0         | M0         | f      | 53  |
| V14     | 3    | T3b        | N2b        | M0         | f      | 80  |
| V15     | 2    | T3b        | N0         | M0         | m      | 62  |
| V16     | 2    | T2b        | N0         | M0         | f      | 79  |
| V17     | 3    | T3c        | N2a        | M0         | m      | 65  |
| V18     | 2    | T3b        | N0         | M0         | f      | 58  |



| Patient | UICC | T category | N category | M category | Gender | AGE |
|---------|------|------------|------------|------------|--------|-----|
| V19     | 2    | T4b        | N0         | M0         | f      | 87  |
| V20     | 3    | T3b        | N2         | M0         | f      | 82  |
| V21     | 3    | T3c        | N1b        | M0         | f      | 71  |
| V22     | 3    | T3b        | N2b        | M0         | m      | 80  |
| V23     | 2    | T3         | N0         | M0         | m      | 87  |
| V24     | 2    | T2b        | N0         | M0         | f      | 80  |
| V25     | 3    | T3         | N1         | M0         | m      | 40  |
| V26     | 2    | T4         | N0         | M0         | m      | 69  |
| V27     | 3    | T2         | N1         | M0         | m      | 70  |
| V28     | 3    | T3         | N1         | M0         | m      | 86  |
| V29     | 3    | T3b        | N1         | M0         | m      | 80  |
| V30     | 3    | T3         | N1         | M0         | m      | 77  |
| V31     | 2    | T3c        | N0         | M0         | f      | 63  |
| V32     | 3    | T3c        | N2a        | M0         | f      | 78  |
| V33     | 3    | T3c        | N1a        | M0         | f      | 82  |
| V34     | 2    | T3a        | N2a        | M0         | m      | 85  |
| V35     | 2    | T3a        | N0         | M0         | m      | 63  |
| V36     | 2    | T3         | N0         | M0         | f      | 88  |
| V37     | 2    | T3         | N0         | M0         | f      | 78  |
| V38     | 2    | T3         | N0         | M0         | m      | 79  |
| V39     | 2    | T3         | N0         | M0         | f      | 77  |
| V40     | 2    | T3         | N0         | M0         | f      | 65  |
| V41     | 2    | T3         | N0         | M0         | f      | 59  |
| V42     | 2    | T3         | N0         | M0         | f      | 82  |
| V43     | 2    | T3         | N0         | M0         | m      | 80  |
| V44     | 2    | T3         | N0         | M0         | m      | 79  |
| V45     | 3    | T4b        | N2b        | M0         | f      | 44  |
| V46     | 2    | T3         | N0         | M0         | f      | 87  |
| V47     | 2    | T3         | N0         | M0         | f      | 74  |
| V48     | 2    | T3         | N0         | M0         | f      | 68  |
| V49     | 2    | T3         | N0         | M0         | f      | 81  |
| V50     | 2    | T3         | N0         | M0         | m      | 70  |
| V51     | 2    | T3         | N0         | M0         | m      | 81  |
| V52     | 3    | T3a        | N2a        | M0         | f      | 74  |
| V53     | 2    | T4b        | N0         | M0         | f      | 89  |
| V54     | 2    | T3a        | N0         | M0         | f      | 76  |
| V55     | 2    | T3d        | N0         | M0         | f      | 94  |
| V56     | 2    | T3b        | N0         | M0         | m      | 82  |
| V57     | 2    | T3d        | N0         | M0         | f      | 92  |
| V58     | 3    | T3b        | N1b        | M0         | f      | 83  |
| V59     | 2    | T3d        | N0         | M0         | f      | 78  |
| V60     | 3    | T4b        | N1b        | M0         | f      | 79  |
| Tr01    | 3    | T4b        | N2b        | M0         | m      | 87  |

| Patient | UICC | T category | N category | M category | Gender | AGE |
|---------|------|------------|------------|------------|--------|-----|
| Tr02    | 2    | T3c        | N0         | M0         | m      | 39  |
| Tr03    | 2    | T3b        | N0         | M0         | f      | 68  |
| Tr04    | 2    | T3b        | N0         | M0         | f      | 85  |
| Tr05    | 3    | T2         | N1b        | M0         | f      | 96  |
| Tr06    | 2    | T3         | N0         | M0         | f      | 90  |
| Tr07    | 3    | T3         | N1         | M0         | f      | 83  |
| Tr08    | 2    | T3a        | N0         | M0         | f      | 79  |
| Tr09    | 2    | T3c        | NX         | M0         | f      | 81  |
| Tr10    | 3    | T3c        | N0         | M0         | f      | 88  |
| Tr11    | 3    | T3b        | N2b        | M0         | f      | 90  |
| Tr12    | 2    | T3         | N0         | M0         | f      | 89  |
| Tr13    | 3    | T3         | N2         | M0         | f      | 76  |
| Tr14    | 3    | T3         | N2         | M0         | f      | 91  |
| Tr15    | 3    | T4b        | N1a        | M0         | f      | 77  |
| Tr16    | 2    | T3b        | N0         | M0         | f      | 76  |
| Tr17    | 2    | T3c        | N0         | M0         | f      | 79  |
| Tr18    | 3    | T4b        | N2b        | M0         | f      | 90  |
| Tr19    | 3    | T3b        | N1b        | M0         | f      | 77  |
| Tr20    | 3    | T4b        | N1b        | M0         | f      | 42  |
| Tr21    | 2    | T3b        | N0         | M0         | m      | 65  |
| Tr22    | 2    | T3a        | N0         | M0         | m      | 66  |
| Tr23    | 3    | T4b        | N1         | M0         | f      | 71  |
| Tr24    | 3    | T3b        | N0         | M0         | m      | 77  |
| Tr25    | 2    | T3b        | N0         | M0         | m      | 78  |
| Tr26    | 2    | T3b        | N0         | M0         | m      | 75  |
| Tr27    | 2    | T3         | N0         | M0         | m      | 69  |
| Tr28    | 3    | T4b        | N0         | M0         | f      | 68  |
| Tr29    | 2    | T3b        | N0         | M0         | m      | 81  |
| Tr30    | 2    | T3c        | N0         | M0         | f      | 53  |
| Tr31    | 3    | T3c        | N2a        | M0         | m      | 66  |
| Tr32    | 3    | T3b        | N2a        | M0         | m      | 73  |
| Tr33    | 2    | T3b        | N0         | M0         | m      | 71  |
| Te01    | 2    | T3b        | N0         | M0         | m      | 76  |
| Te02    | 3    | T3b        | N2a        | M0         | m      | 74  |
| Te03    | 3    | T2         | N1b        | M0         | f      | 84  |
| Te04    | 3    | T3b        | N2a        | M0         | m      | 72  |
| Te05    | 3    | T4         | N1         | M0         | m      | 97  |
| Te06    | 3    | T4         | N1         | M0         | m      | 84  |
| Te07    | 2    | T4b        | N0         | M0         | f      | 65  |

**Supplementary Table 03:** Breakdown of patient samples according to their use in the presented feasibility study. Shown are all samples for the independent verification tumor cohort (V01 – V60) and the training/testing cohort (tumor samples: Tr01 – Tr33 and Te01 – Te07; tumor-free samples H01 – H10; tumor-free and tumor samples from the same patients are written in italic style). Patients used in training/testing are marked in light blue, for testing only in light orange, and all independent verification patients are marked in light green.

| Patient     | Train RF1 | Train RF2 | Train RF3 | Verify RF1+2 | Verify RF 3 |
|-------------|-----------|-----------|-----------|--------------|-------------|
| <i>Tr01</i> | x         | x         | x         |              |             |
| <i>Tr02</i> | x         | x         | x         |              |             |
| <i>Tr03</i> | x         | x         | x         |              |             |
| <i>Tr04</i> | x         | x         | x         |              |             |
| <i>Tr05</i> | x         | x         | x         |              |             |
| <i>Tr06</i> | x         | x         | x         |              |             |
| <i>Tr07</i> | x         | x         | x         |              |             |
| <i>Tr08</i> | x         | x         | x         |              |             |
| <i>Tr09</i> | x         | x         | x         |              |             |
| <i>Tr10</i> | x         | x         | x         |              |             |
| <i>Tr11</i> | x         | x         | x         |              |             |
| <i>Tr12</i> | x         | x         | x         |              |             |
| <i>Tr13</i> | x         | x         | x         |              |             |
| <i>Tr14</i> | x         | x         | x         |              |             |
| <i>Tr15</i> | x         | x         | x         |              |             |
| <i>Tr16</i> | x         | x         | x         |              |             |
| <i>Tr17</i> | x         | x         | x         |              |             |
| <i>Tr18</i> | x         | x         | x         |              |             |
| <i>Tr19</i> | x         | x         | x         |              |             |
| <i>Tr20</i> | x         | x         | x         |              |             |
| <i>Tr21</i> | x         | x         | x         |              |             |
| <i>Tr22</i> | x         | x         | x         |              |             |
| <i>Tr23</i> | x         | x         | x         |              |             |
| <i>Tr24</i> | x         | x         | x         |              |             |
| <i>Tr25</i> | x         | x         | x         |              |             |
| <i>Tr26</i> | x         | x         | x         |              |             |
| <i>Tr27</i> | x         | x         | x         |              |             |
| <i>Tr28</i> | x         | x         | x         |              |             |
| <i>Tr29</i> | x         | x         | x         |              |             |
| <i>Tr30</i> | x         | x         | x         |              |             |
| <i>Tr31</i> | x         |           | x         |              |             |
| <i>Tr32</i> | x         |           | x         |              |             |

| Patient | Train RF1 | Train RF2 | Train RF3 | Verify RF1+2 | Verify RF 3 |
|---------|-----------|-----------|-----------|--------------|-------------|
| Tr33    | x         |           | x         |              |             |
| Te01    |           |           |           | x            | x           |
| Te02    |           |           |           | x            | x           |
| Te03    |           |           |           | x            | x           |
| Te04    |           |           |           | x            | x           |
| Te05    |           |           |           | x            | x           |
| Te06    |           |           |           | x            | x           |
| Te07    |           |           |           | x            | x           |
| H01     | x         |           |           |              |             |
| H02     | x         |           |           |              |             |
| H03     | x         |           |           |              |             |
| H04     | x         |           |           |              |             |
| H05     | x         |           |           |              |             |
| H06     | x         |           |           |              |             |
| H07     | x         |           |           |              |             |
| H08     | x         |           |           |              |             |
| H09     | x         |           |           |              |             |
| H10     |           |           |           | x            |             |
| H11     |           |           |           | x            |             |
| H12     |           |           |           | x            |             |
| H13     |           |           |           | x            |             |
| H14     |           |           |           | x            |             |
| H15     |           |           |           | x            |             |
| H16     |           |           |           | x            |             |
| H17     |           |           |           | x            |             |
| H18     |           |           |           | x            |             |
| H19     |           |           |           | x            |             |
| H20     |           |           |           | x            |             |
| H21     |           |           |           | x            |             |
| H22     |           |           |           | x            |             |
| H23     |           |           |           | x            |             |
| H24     |           |           |           | x            |             |
| H25     |           |           |           | x            |             |
| H26     |           |           |           | x            |             |
| H27     |           |           |           | x            |             |
| H28     |           |           |           | x            |             |
| H29     |           |           |           | x            |             |
| H30     |           |           |           | x            |             |
| H31     |           |           |           | x            |             |
| H32     |           |           |           | x            |             |
| H33     |           |           |           | x            |             |
| H34     |           |           |           | x            |             |
| H35     |           |           |           | x            |             |

| Patient | Train RF1 | Train RF2 | Train RF3 | Verify RF1+2 | Verify RF 3 |
|---------|-----------|-----------|-----------|--------------|-------------|
| H36     |           |           |           | x            |             |
| H37     |           |           |           | x            |             |
| H38     |           |           |           | x            |             |
| H39     |           |           |           | x            |             |
| H40     |           |           |           | x            |             |
| H41     |           |           |           | x            |             |
| H42     |           |           |           | x            |             |
| H43     |           |           |           | x            |             |
| H44     |           |           |           | x            |             |
| H45     |           |           |           | x            |             |
| H46     |           |           |           | x            |             |
| H47     |           |           |           | x            |             |
| H48     |           |           |           | x            |             |
| H49     |           |           |           | x            |             |
| H50     |           |           |           | x            |             |
| H51     |           |           |           | x            |             |
| H52     |           |           |           | x            |             |
| H53     |           |           |           | x            |             |
| H54     |           |           |           | x            |             |
| H55     |           |           |           | x            |             |
| H56     |           |           |           | x            |             |
| H57     |           |           |           | x            |             |
| H58     |           |           |           | x            |             |
| H59     |           |           |           | x            |             |
| H60     |           |           |           | x            |             |
| H61     |           |           |           | x            |             |
| H62     |           |           |           | x            |             |
| H63     |           |           |           | x            |             |
| H64     |           |           |           | x            |             |
| H65     |           |           |           | x            |             |
| H66     |           |           |           | x            |             |
| H67     |           |           |           | x            |             |
| H68     |           |           |           | x            |             |
| H69     |           |           |           | x            |             |
| H70     |           |           |           | x            |             |
| H71     |           |           |           | x            |             |
| H72     |           |           |           | x            |             |
| H73     |           |           |           | x            |             |
| H74     |           |           |           | x            |             |
| H75     |           |           |           | x            |             |
| H76     |           |           |           | x            |             |
| H77     |           |           |           | x            |             |
| H78     |           |           |           | x            |             |

| Patient | Train RF1 | Train RF2 | Train RF3 | Verify RF1+2 | Verify RF 3 |
|---------|-----------|-----------|-----------|--------------|-------------|
| H79     |           |           |           | x            |             |
| H80     |           |           |           | x            |             |
| H81     |           |           |           | x            |             |
| H82     |           |           |           | x            |             |
| H83     |           |           |           | x            |             |
| H84     |           |           |           | x            |             |
| H85     |           |           |           | x            |             |
| H86     |           |           |           | x            |             |
| H87     |           |           |           | x            |             |
| H88     |           |           |           | x            |             |
| H89     |           |           |           | x            |             |
| H90     |           |           |           | x            |             |
| H91     |           |           |           | x            |             |
| H92     |           |           |           | x            |             |
| H93     |           |           |           | x            |             |
| H94     |           |           |           | x            |             |
| H95     |           |           |           | x            |             |
| H96     |           |           |           | x            |             |
| H97     |           |           |           | x            |             |
| H98     |           |           |           | x            |             |
| H99     |           |           |           | x            |             |
| H100    |           |           |           | x            |             |
|         |           |           |           |              |             |
| V01     |           |           |           | x            | x           |
| V02     |           |           |           | x            | x           |
| V03     |           |           |           | x            | x           |
| V04     |           |           |           | x            | x           |
| V05     |           |           |           | x            | x           |
| V06     |           |           |           | x            | x           |
| V07     |           |           |           | x            | x           |
| V08     |           |           |           | x            | x           |
| V09     |           |           |           | x            | x           |
| V10     |           |           |           | x            | x           |
| V11     |           |           |           | x            | x           |
| V12     |           |           |           | x            | x           |
| V13     |           |           |           | x            | x           |
| V14     |           |           |           | x            | x           |
| V15     |           |           |           | x            | x           |
| V16     |           |           |           | x            | x           |
| V17     |           |           |           | x            | x           |
| V18     |           |           |           | x            | x           |
| V19     |           |           |           | x            | x           |
| V20     |           |           |           | x            | x           |

| Patient | Train RF1 | Train RF2 | Train RF3 | Verify RF1+2 | Verify RF 3 |
|---------|-----------|-----------|-----------|--------------|-------------|
| V21     |           |           |           | x            | x           |
| V22     |           |           |           | x            | x           |
| V23     |           |           |           | x            | x           |
| V24     |           |           |           | x            | x           |
| V25     |           |           |           | x            | x           |
| V26     |           |           |           | x            | x           |
| V27     |           |           |           | x            | x           |
| V28     |           |           |           | x            | x           |
| V29     |           |           |           | x            | x           |
| V30     |           |           |           | x            | x           |
| V31     |           |           |           | x            | x           |
| V32     |           |           |           | x            | x           |
| V33     |           |           |           | x            | x           |
| V34     |           |           |           | x            | x           |
| V35     |           |           |           | x            | x           |
| V36     |           |           |           | x            | x           |
| V37     |           |           |           | x            | x           |
| V38     |           |           |           | x            | x           |
| V39     |           |           |           | x            | x           |
| V40     |           |           |           | x            | x           |
| V41     |           |           |           | x            | x           |
| V42     |           |           |           | x            | x           |
| V43     |           |           |           | x            | x           |
| V44     |           |           |           | x            | x           |
| V45     |           |           |           | x            | x           |
| V46     |           |           |           | x            | x           |
| V47     |           |           |           | x            | x           |
| V48     |           |           |           | x            | x           |
| V49     |           |           |           | x            | x           |
| V50     |           |           |           | x            | x           |
| V51     |           |           |           | x            | x           |
| V52     |           |           |           | x            | x           |
| V53     |           |           |           | x            | x           |
| V54     |           |           |           | x            | x           |
| V55     |           |           |           | x            | x           |
| V56     |           |           |           | x            | x           |
| V57     |           |           |           | x            | x           |
| V58     |           |           |           | x            | x           |
| V59     |           |           |           | x            | x           |
| V60     |           |           |           | x            | x           |
